# Supplementary material
Source: Springer Nature journal article supplement (https://www.springermedizin.de/resource/supplementary/12885_2009_1866_MOESM6_ESM.pdf/9461376)

Control PD123, 319 Losartan PD123, 319+Ang II Losartan+Ang II Ang II

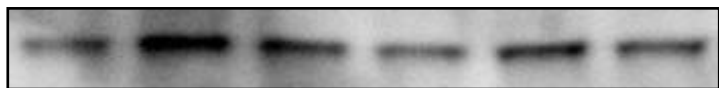

VEGF

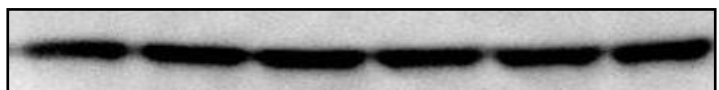

GAPDH

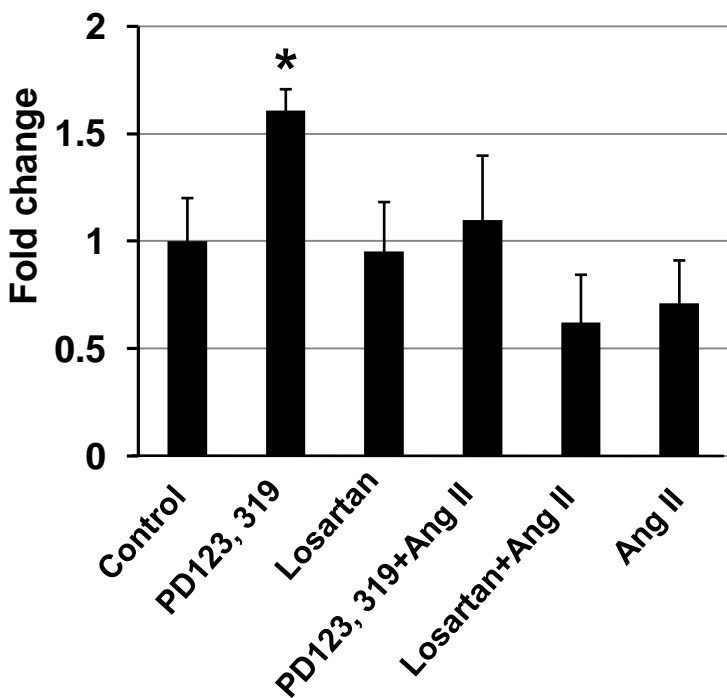

Supplement: MOESM6 [file 9461376]
